# Supplementary material for: High entropy spinel oxide nanoparticles for visible light-assisted photocatalytic degradation of binary mixture of antibiotic pollutants in different water matrixes
Source: Royal Society of Chemistry journal article supplement (doi:10.1039/d4ta02294g), 2024-01-01
Supplement: d4ta02294g1.pdf [file d4ta02294g1.pdf]

## SUPPLEMENTARY INFORMATION

High entropy spinel oxide nanoparticles for visible light-assisted photocatalytic degradation of binary mixture of antibiotics in different water matrixes

Shubhasikha Das<sup>a</sup>, Sudhir Kumar<sup>b</sup>, Suman Sarkar<sup>c</sup>, Debabrata Pradhan<sup>b</sup>,  
Chandra Sekhar Tiwary<sup>d\*</sup>, Shamik Chowdhury<sup>a\*</sup>,

<sup>a</sup>School of Environmental Science and Engineering,  
Indian Institute of Technology Kharagpur, West Bengal 721302, India

<sup>b</sup>Materials Science Centre,  
Indian Institute of Technology Kharagpur, West Bengal 721302, India

<sup>c</sup>Department of Materials Engineering,  
Indian Institute of Technology Jammu, Jammu 181221, India

<sup>d</sup>Department of Metallurgical and Materials Engineering,  
Indian Institute of Technology Kharagpur, West Bengal 721302, India

---

\* Corresponding author.

*E-mail address:* chandra.tiwary@metal.iitkgp.ac.in (C. S. Tiwary)  
shamikc@iitkgp.ac.in (S. Chowdhury)

**Table S1** Basic characteristics of the various real water matrixes.

| Parameters                                      | Unit               | DI  | TW  | GW  | SW  | MWW  | HWW  | PWW  | T-MWW | Methodology                                                                        |
|-------------------------------------------------|--------------------|-----|-----|-----|-----|------|------|------|-------|------------------------------------------------------------------------------------|
| pH                                              | –                  | 6.5 | 7.7 | 7.1 | 6.9 | 6.7  | 7.2  | 4.17 | 6.11  | IS 3025 (Part 11), 1983<br>APHA (23 <sup>rd</sup> edition), 4500 H <sup>+</sup> B  |
| Turbidity                                       | NTU                | –   | 1.4 | 2.2 | 7.2 | 72.8 | 23.5 | 3.4  | 1.9   | IS 3025 (Part 10), 1984<br>APHA (23 <sup>rd</sup> edition), 2130 B                 |
| Total dissolved solid (TDS)                     | mg L <sup>-1</sup> | –   | 155 | –   | 146 | 395  | 255  | 9129 | 320   | IS 3025 (Part 16), 1984<br>APHA (23 <sup>rd</sup> edition), 2540C                  |
| Total suspended solid (TSS)                     | mg L <sup>-1</sup> | –   | 2.2 | 56  | 51  | 88   | 46   | 22   | 7.3   | IS 3025 (Part 17), 1984<br>APHA (23 <sup>rd</sup> edition), 2540 D                 |
| Biological oxygen demand (BOD)                  | mg L <sup>-1</sup> | –   | 3.5 | 6   | 8   | 206  | 124  | 15   | 15    | IS 3025 (Part 44), 1993                                                            |
| Chemical oxygen demand (COD)                    | mg L <sup>-1</sup> | –   | 5.3 | 81  | 34  | 172  | 61   | 532  | 76    | APHA (23 <sup>rd</sup> edition), 5220 B                                            |
| Chloride (Cl <sup>-</sup> )                     | mg L <sup>-1</sup> | –   | 32  | 5   | 41  | 56   | 81   | 58   | 65    | IS:3025 (Part 32), 1988<br>APHA (23 <sup>rd</sup> edition), 4500 Cl <sup>-</sup> B |
| Nitrate (NO <sub>3</sub> <sup>-</sup> )         | mg L <sup>-1</sup> | –   | 8   | 7.8 | 12  | 42   | 52   | 21   | 14    | APHA (23 <sup>rd</sup> edition), 3500 NO <sub>3</sub> <sup>-</sup>                 |
| Bicarbonate (HCO <sub>3</sub> <sup>-</sup> ) as | mg L <sup>-1</sup> | –   | 57  | 26  | 64  | 218  | 276  | –    | 13    | APHA (23 <sup>rd</sup> edition), 2320 B                                            |

CaCO<sub>3</sub>

|                                                 |                    |   |     |     |    |    |    |     |    |                                                                                                 |
|-------------------------------------------------|--------------------|---|-----|-----|----|----|----|-----|----|-------------------------------------------------------------------------------------------------|
| Sulphahte (SO <sub>4</sub> <sup>2-</sup> )      | mg L <sup>-1</sup> | – | 17  | 5.2 | 21 | 44 | 31 | 28  | 23 | IS:3025(Part 24), 1986<br>APHA (23 <sup>rd</sup> edition), 4500 SO <sub>4</sub> <sup>2-</sup> E |
| Phosphate (PO <sub>4</sub> <sup>3-</sup> ) as P | mg L <sup>-1</sup> | – | 0.6 | –   | 51 | 49 | 57 | 382 | 2  | APHA (23 <sup>rd</sup> edition), 4500 PO <sub>4</sub> <sup>3-</sup> D                           |

---

**Table S2** Specific surface area of FeCoNiCuZn and (FeCoNiCuZn)<sub>a</sub>O<sub>b</sub> NPs, as determined by the multipoint Brunauer–Emmett–Teller method.

| Sample                                       | SSA (m <sup>2</sup> g <sup>-1</sup> ) |
|----------------------------------------------|---------------------------------------|
| FeCoNiCuZn                                   | 19                                    |
| (FeCoNiCuZn) <sub>a</sub> O <sub>b_250</sub> | 23                                    |
| (FeCoNiCuZn) <sub>a</sub> O <sub>b_350</sub> | 40                                    |
| (FeCoNiCuZn) <sub>a</sub> O <sub>b_450</sub> | 54                                    |
| (FeCoNiCuZn) <sub>a</sub> O <sub>b_550</sub> | 67                                    |

**Table S3** Elemental composition (at.%) of (FeCoNiCuZn)<sub>a</sub>O<sub>b</sub> NPs based on EDS analysis.

| Sample                                        | Fe    | Co    | Ni    | Cu    | Zn    | O     |
|-----------------------------------------------|-------|-------|-------|-------|-------|-------|
| (FeCoNiCuZn) <sub>a</sub> O <sub>b</sub> _250 | 12.55 | 11.33 | 11.26 | 14.23 | 10.40 | 40.23 |
| (FeCoNiCuZn) <sub>a</sub> O <sub>b</sub> _350 | 11.90 | 11.03 | 10.55 | 13.95 | 9.14  | 43.43 |
| (FeCoNiCuZn) <sub>a</sub> O <sub>b</sub> _450 | 11.23 | 10.65 | 10.28 | 12.19 | 8.97  | 46.68 |
| (FeCoNiCuZn) <sub>a</sub> O <sub>b</sub> _550 | 10.44 | 9.99  | 9.61  | 11.10 | 8.31  | 50.55 |

**Table S4** Comparison of the photocatalytic performance of (FeCoNiCuZn)<sub>a</sub>O<sub>b</sub>\_550 NPs for degradation of SMX and OFX with contemporary semiconductor-based photocatalysts.

| Photocatalyst                                                        | $C_0$<br>(mg L <sup>-1</sup> ) | Time<br>(min) | Dose<br>(g L <sup>-1</sup> ) | Irradiance type | Degradation<br>(%) | $k$<br>( $\times 10^{-3}$ min <sup>-1</sup> ) | Reference  |
|----------------------------------------------------------------------|--------------------------------|---------------|------------------------------|-----------------|--------------------|-----------------------------------------------|------------|
| <i>Sulfamethoxazole</i>                                              |                                |               |                              |                 |                    |                                               |            |
| ZnO                                                                  | 10                             | 90            | 0.3                          | Visible light   | 20                 | 10.2                                          | 1          |
| Cu <sub>2</sub> O                                                    | 3                              | 30            | 0.4                          | Visible light   | 48                 | –                                             | 2          |
| Fe <sub>2</sub> O <sub>3</sub>                                       | 10                             | 90            | 0.3                          | Visible light   | 52                 | –                                             | 1          |
| CuFeS <sub>2</sub> – dendritic mesoporous silica-titania/persulfate  | 10                             | 140           | 1.2                          | Visible light   | 89                 | 14.6                                          | 3          |
| N–SrTiO <sub>3</sub> /NH <sub>4</sub> V <sub>4</sub> O <sub>11</sub> | 50                             | 120           | 2.0                          | Visible light   | 91                 | 13.2                                          | 4          |
| Co-CuS@TiO <sub>2</sub>                                              | 5                              | 120           | 0.25                         | Visible light   | 100                | 21.6                                          | 5          |
| N–ZnO/C@ Bi <sub>2</sub> MoO <sub>6</sub>                            | 5                              | 120           | 1.0                          | Visible light   | 93                 | 25.1                                          | 6          |
| FeCoNiCuZn                                                           | 5                              | 120           | 0.5                          | Visible light   | 94                 | 19.5                                          | 7          |
| MnFeCoNiCu                                                           | 5                              | 120           | 0.5                          | Visible light   | 95                 | 22                                            | 8          |
| (FeCoNiCuZn) <sub>a</sub> O <sub>b</sub> _550                        | 5                              | 90            | 0.5                          | Visible light   | 97                 | 31.9                                          | This study |

| <i>Ofloxacin</i>                                       |                        |     |      |               |    |      |            |
|--------------------------------------------------------|------------------------|-----|------|---------------|----|------|------------|
| WO <sub>3</sub>                                        | 10                     | 240 | 0.25 | UV(c) light   | 50 | 2.2  | 9          |
| α-Fe <sub>2</sub> O <sub>3</sub>                       | 20                     | 60  | 0.1  | Visible light | 56 | 14.0 | 10         |
| ZnO                                                    | 30                     | 180 | 0.25 | Visible light | 57 | 8.2  | 11         |
| Cu-doped TiO <sub>2</sub>                              | 10                     | 180 | 0.45 | Visible light | 72 | 4.5  | 12         |
| Bi/Ni co-doped TiO <sub>2</sub>                        | 25                     | 360 | 1.5  | Visible light | 86 | 6.2  | 13         |
| Bi <sub>2</sub> MoO <sub>6</sub> -rGO-TiO <sub>2</sub> | 4 × 10 <sup>-5</sup> M | 120 | 0.4  | Visible light | 92 | 17.4 | 14         |
| BiFeO <sub>3</sub> /Bi-g-C <sub>3</sub> N <sub>4</sub> | 10                     | 90  | 0.25 | Visible light | 96 | 34.4 | 15         |
| MnFeCoNiCu                                             | 5                      | 120 | 0.5  | Visible light | 94 | 21   | 8          |
| (FeCoNiCuZn) <sub>a</sub> O <sub>b</sub> _550          | 5                      | 90  | 0.5  | Visible light | 95 | 26.7 | This study |

**Table S5** Major intermediates formed during photocatalytic degradation of SMX over (FeCoNiCuZn)<sub>a</sub>O<sub>b</sub>\_550 NPs, as detected through LCMS.

| Intermediate | <i>m/z</i> | Molecular formula                                              | Chemical structure                                                                   | Chemical name                                                                                |
|--------------|------------|----------------------------------------------------------------|--------------------------------------------------------------------------------------|----------------------------------------------------------------------------------------------|
| S1           | 276        | C <sub>9</sub> H <sub>13</sub> N <sub>3</sub> O <sub>5</sub> S | 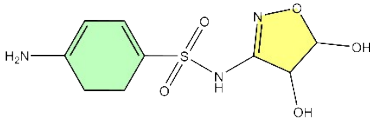   | 4-amino- <i>N</i> -(4,5-dihydroxy-4,5-dihydroisoxazol-3-yl)cyclohexa-1,3-diene-1-sulfonamide |
| S8           | 177        | C <sub>4</sub> H <sub>6</sub> N <sub>2</sub> O <sub>4</sub> S  |    | 4-hydroxybenzene-1-sulfonamide                                                               |
| S3           | 171        | C <sub>6</sub> H <sub>8</sub> N <sub>2</sub> O <sub>2</sub> S  |    | 4-amino benzenesulfonamide                                                                   |
| S4           | 118        | C <sub>4</sub> H <sub>6</sub> O <sub>4</sub>                   |    | succinic acid                                                                                |
| S5           | 156        | C <sub>6</sub> H <sub>7</sub> NO <sub>2</sub> S                |  | 4-sulfonylcyclohex-2-en-1-imine                                                              |
| S6           | 99         | C <sub>4</sub> H <sub>6</sub> N <sub>2</sub> O                 |   | 5-methylisoxazol-3-amine                                                                     |
| S7           | 127        | C <sub>4</sub> H <sub>4</sub> N <sub>2</sub> O <sub>3</sub>    |   | 5-methyl-3-nitroisoxazole                                                                    |
| S8           | 122        | C <sub>4</sub> H <sub>9</sub> NO <sub>3</sub>                  |   | ( <i>E</i> )-1-aminobut-2-ene-1,2,3-triol                                                    |
| S9           | 102        | C <sub>4</sub> H <sub>7</sub> NO <sub>2</sub>                  |   | ( <i>Z</i> )-2-hydroxybut-2-enamide                                                          |



S10

94

$C_6H_7N$

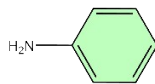

Aniline

S11

60

$C_3H_6O$

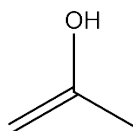

prop-1-en-2-ol

**Table S6** Major intermediates formed during photocatalytic degradation of OFX over (FeCoNiCuZn)<sub>a</sub>O<sub>b</sub>\_550 NPs, as detected through LCMS.

| Intermediate | <i>m/z</i> | Molecular formula                                              | Chemical structure                                                                   | Chemical name                                                                                                                  |
|--------------|------------|----------------------------------------------------------------|--------------------------------------------------------------------------------------|--------------------------------------------------------------------------------------------------------------------------------|
| O1           | 349        | C <sub>17</sub> H <sub>18</sub> FN <sub>3</sub> O <sub>4</sub> | 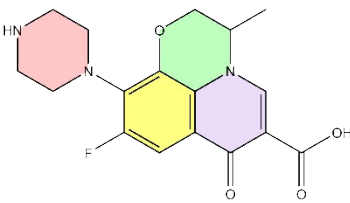   | 9-fluoro-3-methyl-7-oxo-10-(piperazin-1-yl)-3,7-dihydro-2 <i>H</i> -[1,4]oxazino[2,3,4- <i>ij</i> ]quinoline-6-carboxylic acid |
| O2           | 327        | C <sub>17</sub> H <sub>17</sub> N <sub>3</sub> O <sub>4</sub>  |    | 3-methyl-7-oxo-10-(piperazin-1-yl)-3,7-dihydro-2 <i>H</i> -[1,4]oxazino[2,3,4- <i>ij</i> ]quinoline-6-carboxylic acid          |
| O3           | 290        | C <sub>15</sub> H <sub>16</sub> FN <sub>3</sub> O <sub>2</sub> |  | 9-fluoro-10-(piperazin-1-yl)-2,3-dihydro-7 <i>H</i> -[1,4]oxazino[2,3,4- <i>ij</i> ]quinolin-7-one                             |
| O4           | 251        | C <sub>13</sub> H <sub>15</sub> FN <sub>2</sub> O <sub>2</sub> |  | 7-(dimethylamino)-1-ethyl-6-fluoro-8-hydroxyquinolin-4(1 <i>H</i> )-on                                                         |
| O5           | 235        | C <sub>13</sub> H <sub>16</sub> N <sub>2</sub> O <sub>2</sub>  |  | 7-(dimethylamino)-1-ethyl-8-hydroxyquinolin-4(1 <i>H</i> )-one                                                                 |
| O6           | 177        | C <sub>10</sub> H <sub>13</sub> NO <sub>2</sub>                |   | 2-(ethyl(methyl)amino)-3-hydroxybenzaldehyde                                                                                   |

|     |     |                       |                                                                                     |                                                                              |
|-----|-----|-----------------------|-------------------------------------------------------------------------------------|------------------------------------------------------------------------------|
| O7  | 211 | $C_{10}H_{11}FN_2O_2$ | 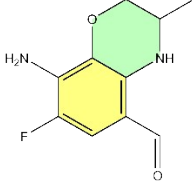  | 8-amino-7-fluoro-3-methyl-3,4-dihydro-2H-benzo[b][1,4]oxazine-5-carbaldehyde |
| O8  | 148 | $C_7H_{15}FN_2$       |    | 1-(2-fluoroethyl)-4-methylpiperazine                                         |
| O9  | 101 | $C_5H_{12}N_2$        |    | 1-methylpiperazine                                                           |
| O10 | 127 | $C_5H_8N_2O_2$        |   | 2-formyl-3-iminobutanamide                                                   |
| O11 | 117 | $C_4H_4O_4$           |  | (E)-2-formyl-3-hydroxyacrylic acid                                           |
| O12 | 87  | $C_5H_{13}N$          |  | N-ethyl-N-methylethanamine                                                   |
| O13 | 73  | $C_3H_4O_2$           |  | acrylic acid                                                                 |

---

**Table S7** Leached metal ion concentration (in  $\mu\text{g L}^{-1}$ ) after photocatalytic degradation of SMX and OFX over  $(\text{FeCoNiCuZn})_a\text{O}_b$ \_550 NPs under visible light irradiation.

|     | $\text{Fe}^{2+}$ | $\text{Co}^{2+}$ | $\text{Ni}^{2+}$ | $\text{Cu}^{2+}$ | $\text{Zn}^{2+}$ |
|-----|------------------|------------------|------------------|------------------|------------------|
| SMX | 5                | 280              | 245              | 125              | 10               |
| OFX | BDL*             | 220              | 289              | 245              | 85               |

\*BDL: Below detection limit

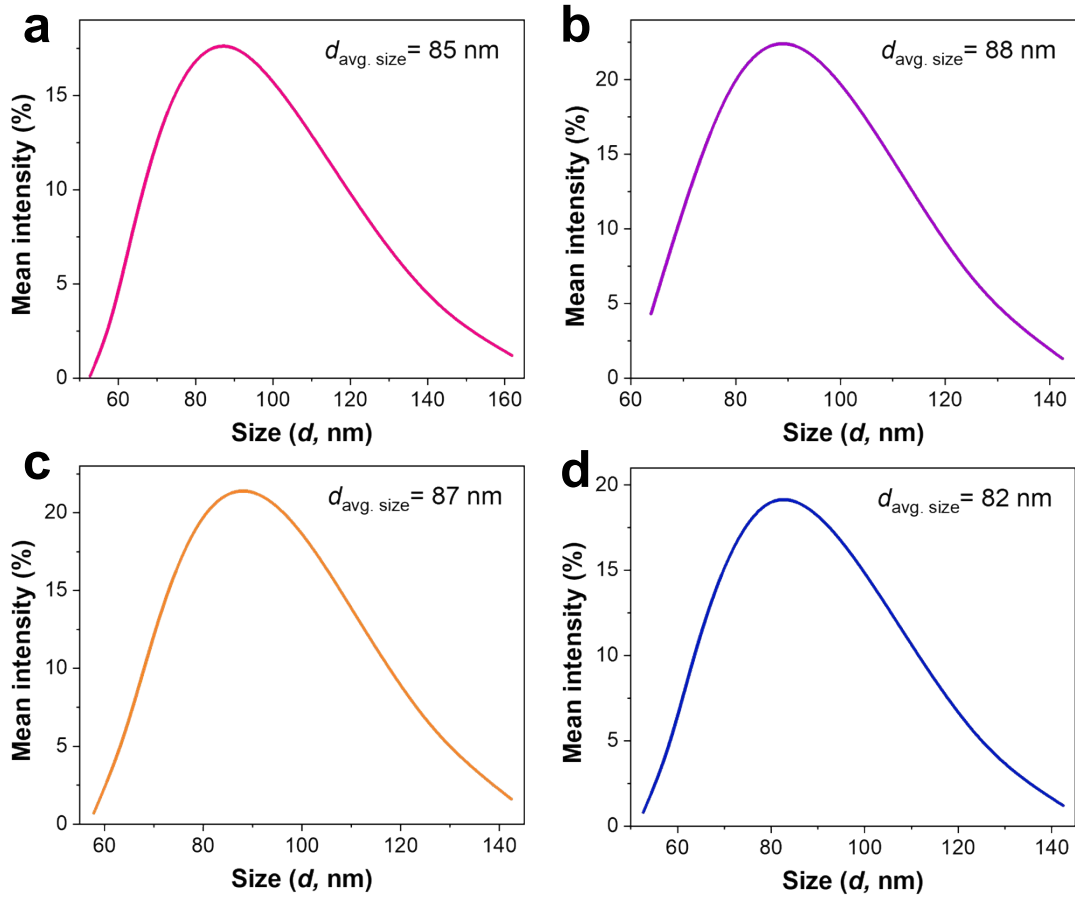

**Figure S1** Particle size distributions of (a)  $(\text{FeCoNiCuZn})_a\text{O}_b_{250}$  NPs, (b)  $(\text{FeCoNiCuZn})_a\text{O}_b_{350}$  NPs, (c)  $(\text{FeCoNiCuZn})_a\text{O}_b_{450}$  NPs, and (d)  $(\text{FeCoNiCuZn})_a\text{O}_b_{550}$  NPs.

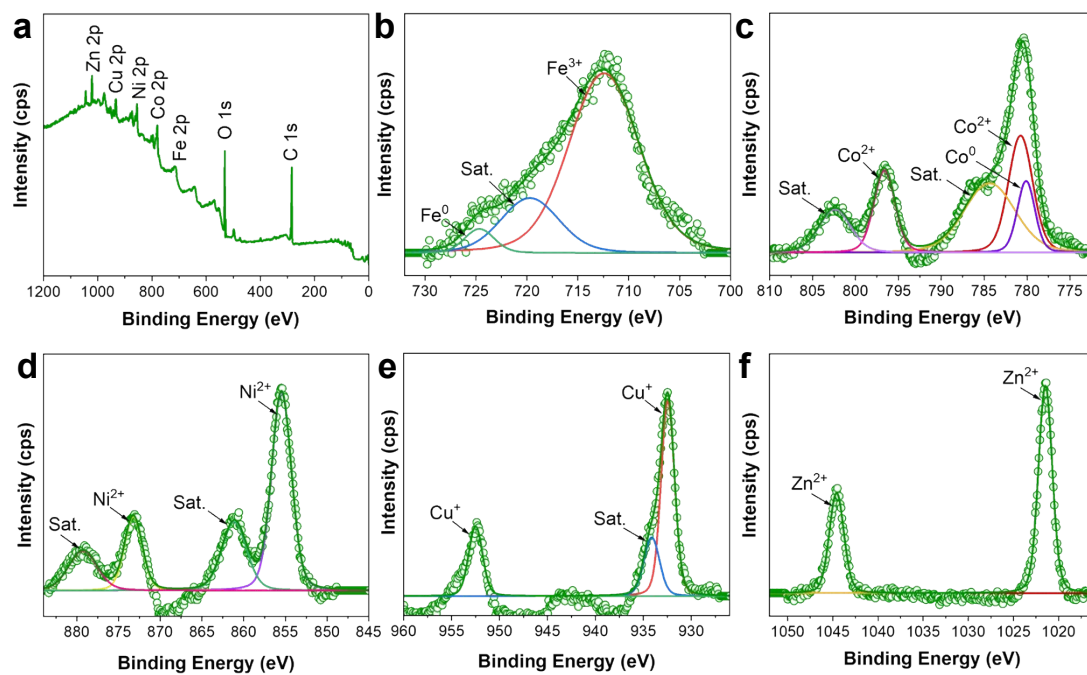

**Figure S2** (a) XPS survey scan and the deconvoluted high-resolution (b) Fe 2p (c) Co 2p, (d) Ni 2p, (e) Cu 2p, and (g) Zn 2p spectra of pristine FeCoNiCuZn NPs.

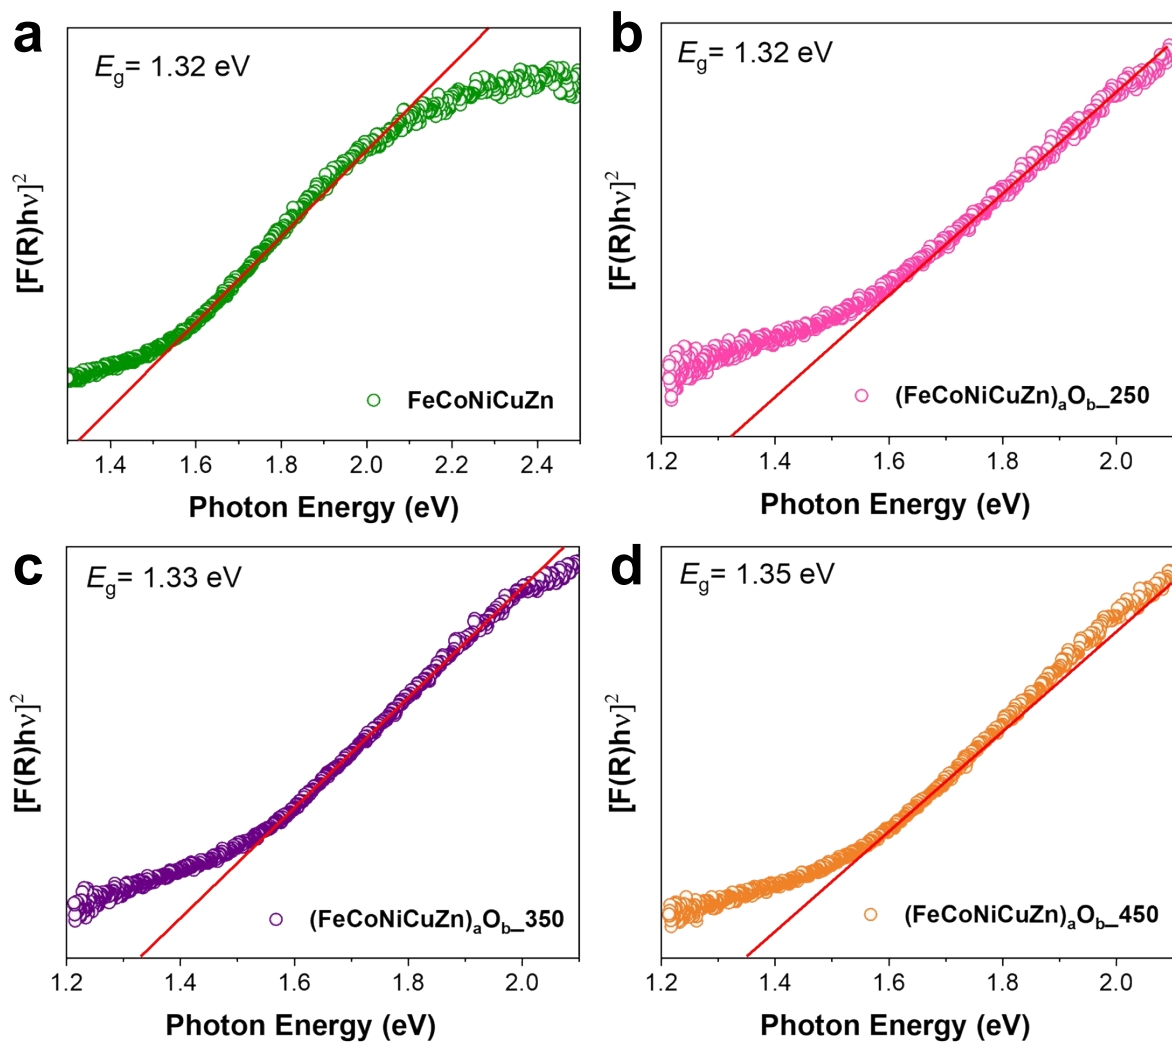

**Figure S3** Kubelka–Munk plots of (a) FeCoNiCuZn NPs, (b)  $(\text{FeCoNiCuZn})_a\text{O}_b_{250}$  NPs, (c)  $(\text{FeCoNiCuZn})_a\text{O}_b_{350}$  NPs, and (d)  $(\text{FeCoNiCuZn})_a\text{O}_b_{450}$  NPs for estimating the bandgap energy.

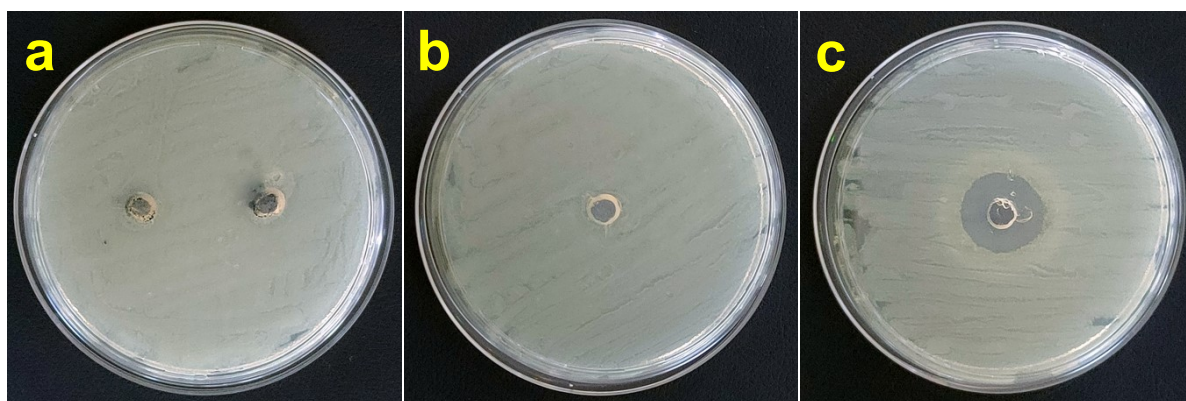

**Figure S4** Digital images illustrating the results of agar-well diffusion assay for toxicity assessment of  $(\text{FeCoNiCuZn})_a\text{O}_b_{550}$  NPs (a), with PBS as negative control (b) and CFX as positive control (c).



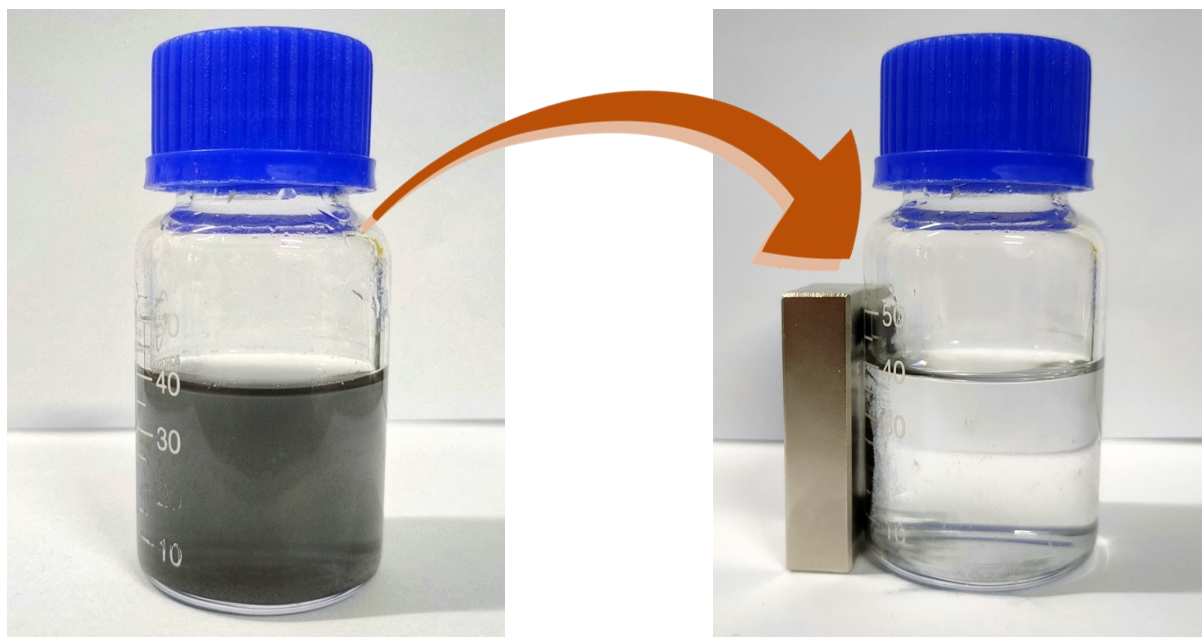

**Figure S5** Digital images illustrating the magnetic separation of  $(\text{FeCoNiCuZn})_a\text{O}_b$  NPs from aqueous solution.

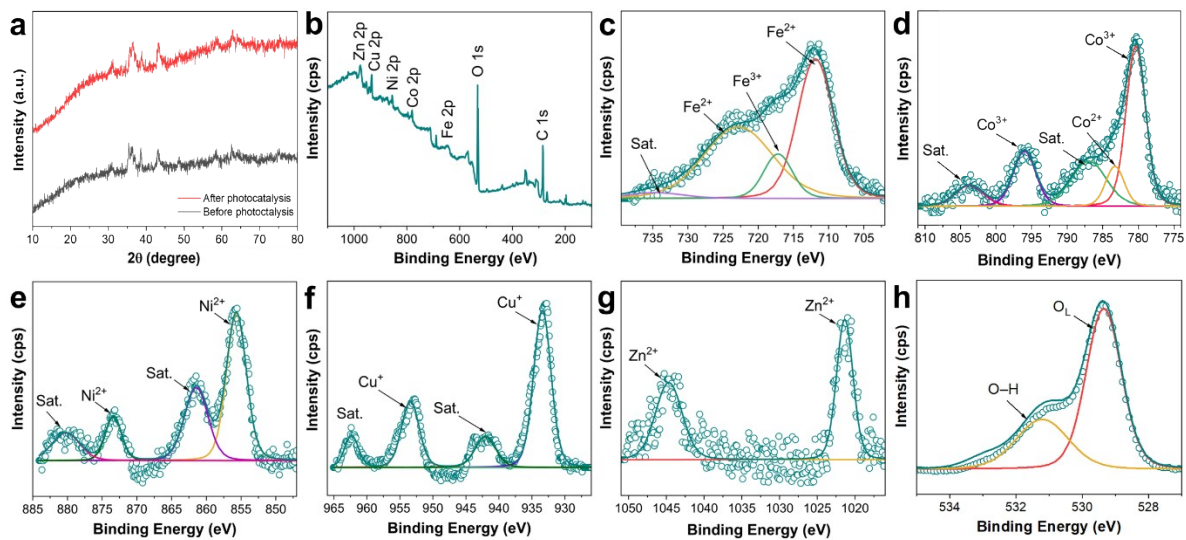

**Figure S6** (a) Comparison of the XRD patterns of  $(\text{FeCoNiCuZn})_a\text{O}_b_{-550}$  NPs before and after three consecutive photocatalytic runs. (b) XPS survey scan and the deconvoluted high-resolution (c) Fe 2p (d) Co 2p, (e) Ni 2p, (f) Cu 2p, (g) Zn 2p, and (h) O 1s spectra of  $(\text{FeCoNiCuZn})_a\text{O}_b_{-550}$  NPs after three consecutive photocatalytic runs.

## References

- 1 P. Dhiman, A. Kumar, M. Shekh, G. Sharma, G. Rana, D. V. N. Vo, N. AlMasoud, M. Naushad and Z. A. ALothman, *Environ. Res.*, 2021, **197**, 111074.
- 2 K. Sekar, C. Chuaicham, B. Vellaichamy, W. Li, W. Zhuang, X. Lu, B. Ohtani and K. Sasaki, *Appl. Catal. B Environ.*, 2021, **294**, 120221.
- 3 T. S. Ntelane, U. Feleni, N. H. Mthombeni and A. T. Kuvarega, *J. Colloid Interface Sci.*, 2024, **654**, 660–676.
- 4 Y. Zhang, Y. Li and Y. Yuan, *J. Colloid Interface Sci.*, 2023, **645**, 860–869.
- 5 O. Mertah, A. Gómez-Avilés, A. Slassi, A. Kherbeche, C. Belver and J. Bedia, *Catal. Commun.*, 2023, **175**, 106611.
- 6 A. Wang, J. Ni, W. Wang, X. Wang, D. Liu and Q. Zhu, *J. Hazard. Mater.*, 2022, **426**, 128106.
- 7 S. Das, M. Sanjay, A. R. Singh Gautam, R. Behera, C. S. Tiwary and S. Chowdhury, *J. Environ. Manage.*, 2023, **342**, 118081.
- 8 S. Das, M. Sanjay, S. Kumar, S. Sarkar, C. S. Tiwary and S. Chowdhury, *Chem. Eng. J.*, 2023, **476**, 146719.
- 9 J. Piriyanon, P. Takhai, S. Patta, T. Chankhanittha, T. Senasu, S. Nijpanich, S. Juabrum, N. Chanlek and S. Nanan, *Opt. Mater.*, 2021, **121**, 111573.
- 10 H. Alamgholiloo, N. Noroozi Pesyan and A. Poursattar Marjani, *Sep. Purif. Technol.*, 2023, **305**, 122442.
- 11 H. Cai, J. Wang, Z. Du, Z. Zhao, Y. Gu, Z. Guo, Y. Huang, C. Tang, G. Chen and Y. Fang, *Colloids Surfaces A Physicochem. Eng. Asp.*, 2023, **663**, 131050.
- 12 R. Kaur, A. Kaur, R. Kaur, S. Singh, M. S. Bhatti, A. Umar, S. Baskoutas and S. K. Kansal, *Adv. Powder Technol.*, 2021, **32**, 1350–1361.
- 13 V. Bhatia, A. K. Ray and A. Dhir, *Sep. Purif. Technol.*, 2016, **161**, 1–7.
- 14 A. Raja, N. Son and M. Kang, *Environ. Res.*, 2021, **199**, 111261.
- 15 S. H. Ammar, F. D. Ali, H. J. Hadi and Z. H. Jabbar, *Mater. Sci. Semicond. Process.*, 2024, **171**, 108026.
